# Supplementary material for: Life and death in Trypillia times: Interdisciplinary analyses of the unique human remains from the settlement of Kosenivka, Ukraine (3700–3600 BCE)
Source: PubMed Central journal article supplement (PMC11633957; doi:10.1371/journal.pone.0289769), 2024-12-11

**Figure 18:** Collagen yield vs. <sup>14</sup>C result of human and faunal samples from the Kosenivka house 6 measured at the Radiocarbon Laboratory, Poznan (see S1 Tables).

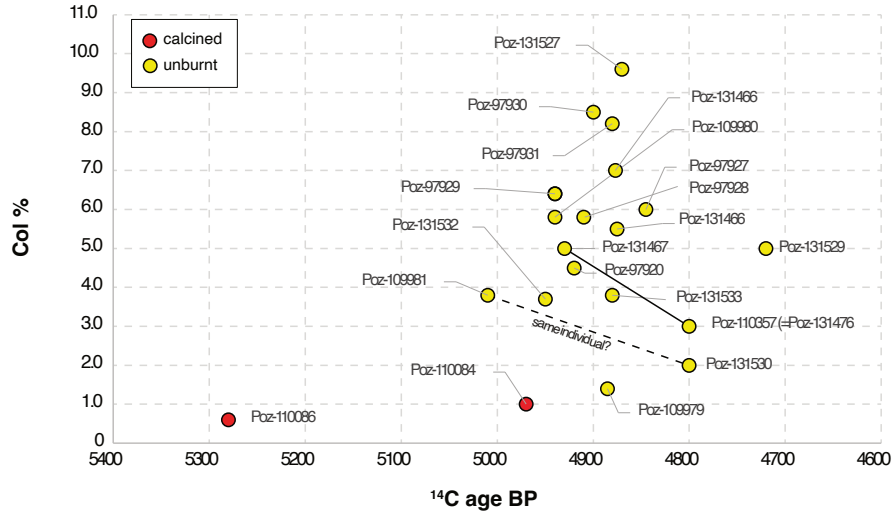

**Figure 19:** Calibration curve of all radiocarbon dates obtained for Kosenivka (n=26) using OxCal v. 4.4.

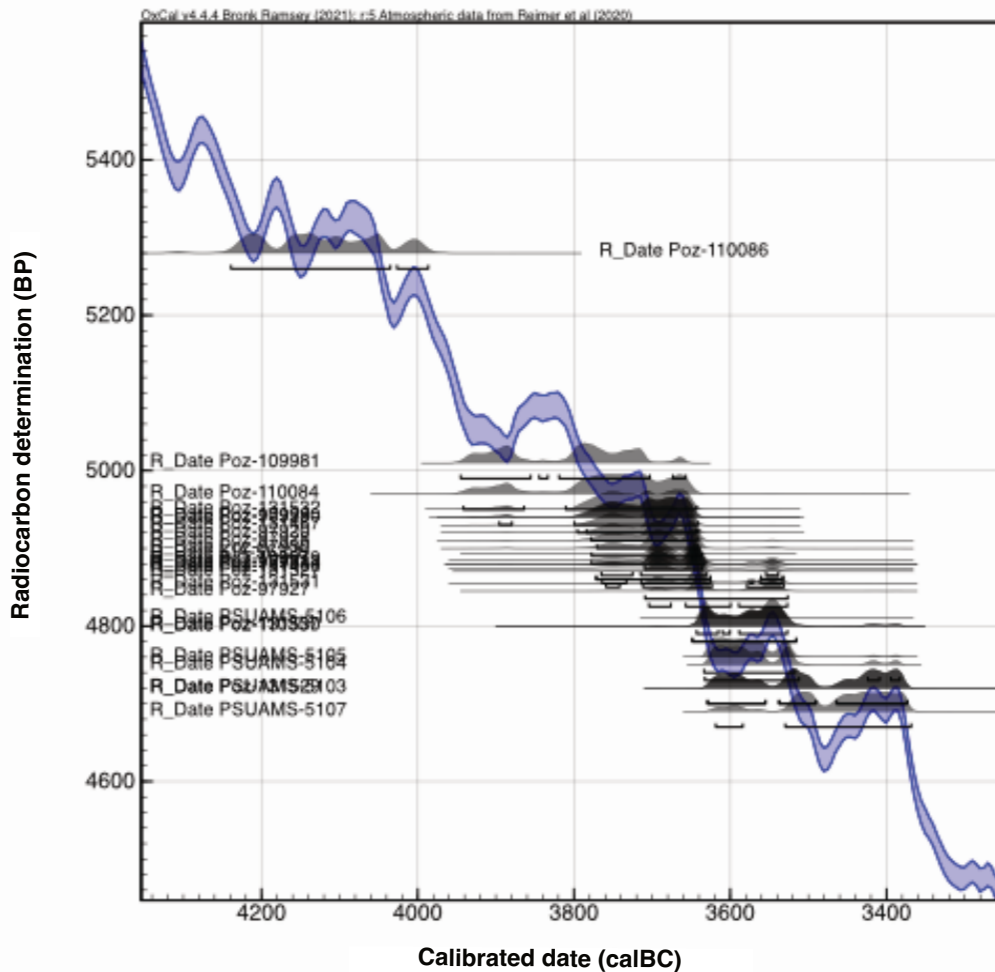

Supplement: pone.0289769.s002.pdf [file pone.0289769.s002.pdf]
